# Supplementary material
Source: MDPI journal article supplement (https://www.mdpi.com/2312-7481/8/3/31)
Supplement: s1 [file s1]

# Supplementary Material

## 1. SM-1: Details regarding the reflectance calculation for *p*-polarized light

The transfer matrix technique (TMM) is used for calculating the reflectance of *p*-polarized monochromatic light and is briefly presented here using Ref. [1–3]. All layers stacked along the *z*-axis are considered uniform, non-magnetic, and isotropic except the phosphorene layer [1,2]. The refractive index of the anisotropic phosphorene layer is calculated by the coordinate transformation method [2]. First, the rotation angle ( $\varphi$ ) should be tuned by rotating the SPR sensor structure about the *z*-axis to match SPR excitation conditions [1–3]. The optimal rotational angle ( $\varphi$ ) for each SPR structure is set at minimum reflectance value and maximum sensitivity. Once the  $\varphi$  is set—the range may lie in between 0 to 180°—the incident angle  $\theta$  is varied from 0–90° at each value of  $\varphi$ . After applying boundary conditions for tangential components of E and H fields, the characteristic matrix for the N-layer multilayer structure can be expressed as:

$$M = \prod_{k=2}^{N-1} M_k \quad (1)$$

where  $M_k$  denoted the matrix for  $k^{\text{th}}$  layer and expressed as:

$$M_k = \begin{bmatrix} M_{11} & M_{12} \\ M_{21} & M_{22} \end{bmatrix} = \begin{bmatrix} \cos \beta_k & \frac{-i \sin \beta_k}{\rho_k} \\ -i \rho_k \sin \beta_k & \cos \beta_k \end{bmatrix} \quad (2)$$

Here, the term optical admittance  $\beta_k$  and phase factor  $q_k$  of the  $k^{\text{th}}$  layer is expressed as:

$$\beta_k = d_k \gamma_o (\epsilon_k - n_1^2 \sin^2 \theta_1)^{1/2} \quad (3)$$

and

$$q_k = \sqrt{\frac{\mu_k}{\epsilon_k}} \cos \theta \quad \text{for } p\text{-polarized light}$$

where,  $\theta_1$  and  $\gamma_o$  indicates the incident angle and the free space wavenumber.

After following straightforward mathematical steps, the reflectance of N layered SPR sensor structure can be defined as [3]:

$$R_p = \left| \frac{(M_{11} + M_{12}\rho_N)\rho_1 - (M_{21} + M_{22}\rho_N)}{(M_{11} + M_{12}\rho_N)\rho_1 + (M_{21} + M_{22}\rho_N)} \right|^2 \quad (4)$$

Thus, reflectance curve may be plotted as  $R_p$  vs. incident angle using Equation (4). Further, different performance parameters described in Section 2 of the manuscript are analyzed through reflectance curves.

## 2. SM-2: Optimization of rotation angle ( $\varphi$ ) for different Cu/Ni metal layer thickness combinations

A few Cu/Ni metal thickness combinations have been chosen to optimize the rotation angle ( $\varphi$ ) for the proposed SPR sensor in terms of minimum reflectance, i.e.,  $R_{\min}$ , and maximum sensitivity, as shown in Figures S1–S11. The maximum sensitivity and  $R_{\min}$  are achieved at the optimized value of  $\varphi$ , i.e., 72° with Cu and Ni thicknesses of 15nm and 80nm, respectively, as shown in Figure S9.

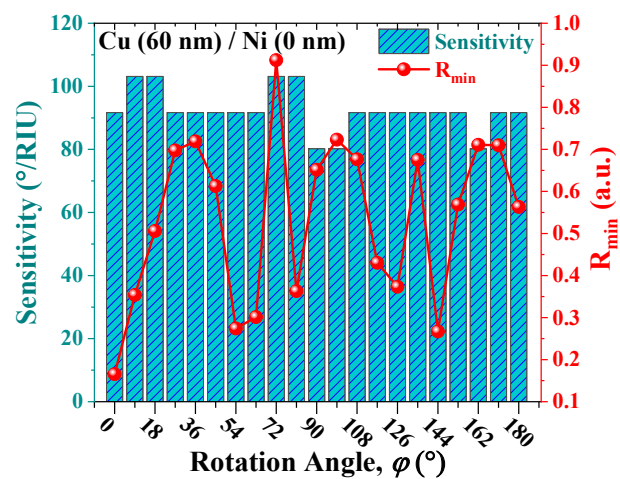

Figure S1. The sensitivity and  $R_{\min}$  with different rotation angle at Cu (60 nm) / Ni (0 nm).

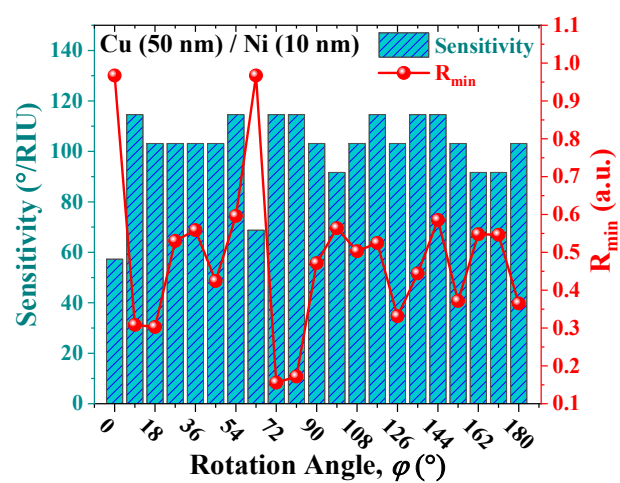

Figure S2. The sensitivity and  $R_{\min}$  with different rotation angle at Cu (50 nm) / Ni (10 nm).

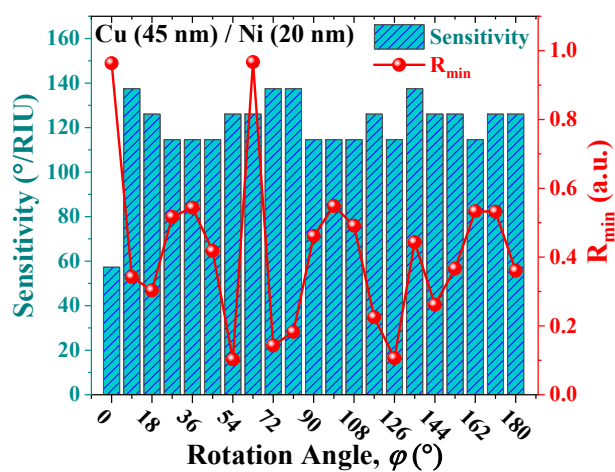

Figure S3. The sensitivity and  $R_{\min}$  with different rotation angle at Cu (45 nm) / Ni (20 nm).

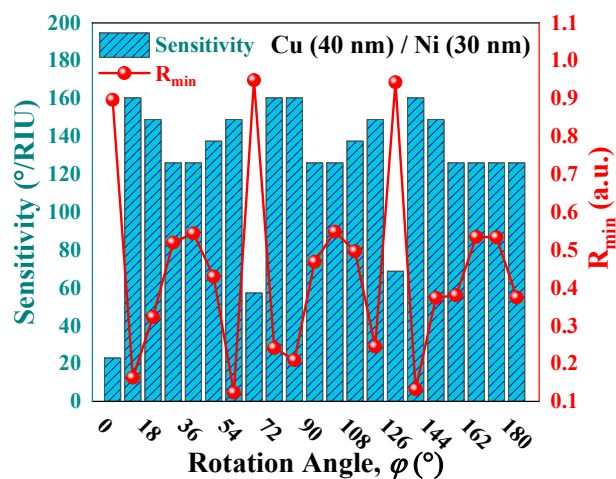

Figure S4. The sensitivity and  $R_{\min}$  with different rotation angle at Cu (40 nm) / Ni (30 nm)

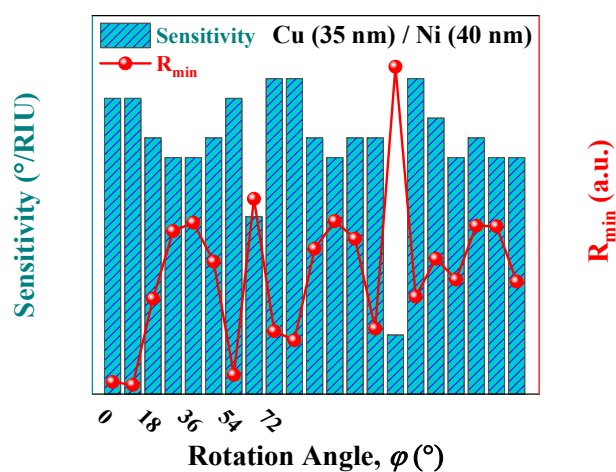

Figure S5. The sensitivity and  $R_{\min}$  with different rotation angle at Cu (35 nm) / Ni (40 nm)

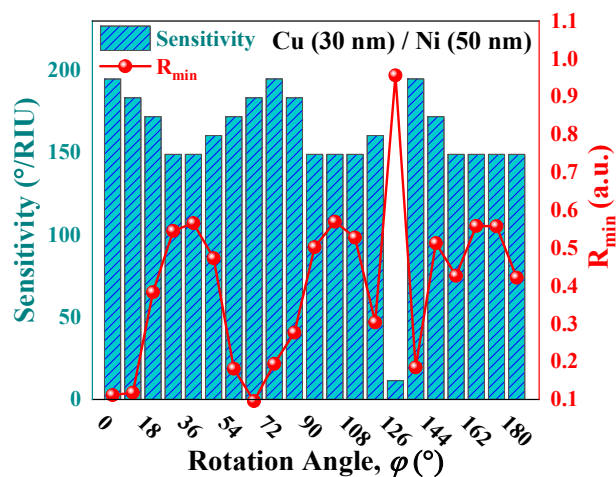

Figure S6. The sensitivity and  $R_{\min}$  with different rotation angle at Cu (30 nm) / Ni (50 nm)

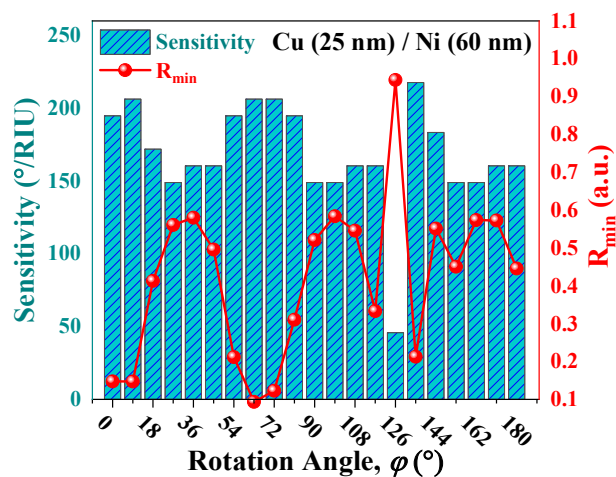

Figure S7. The sensitivity and  $R_{\min}$  with different rotation angle at Cu (25 nm) / Ni (60 nm)

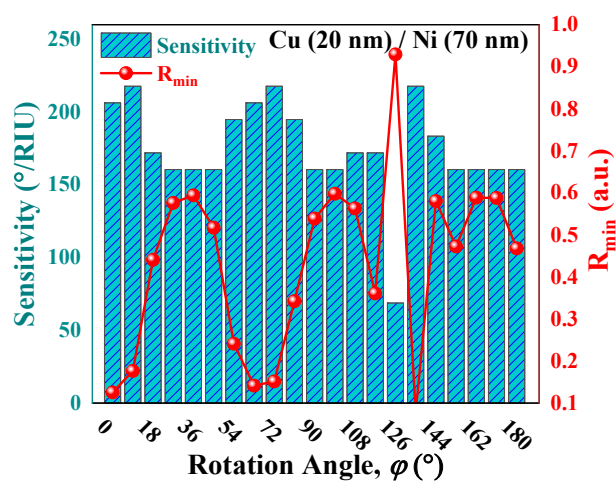

Figure S8. The sensitivity and  $R_{\min}$  with different rotation angle at Cu (20 nm) / Ni (70 nm)

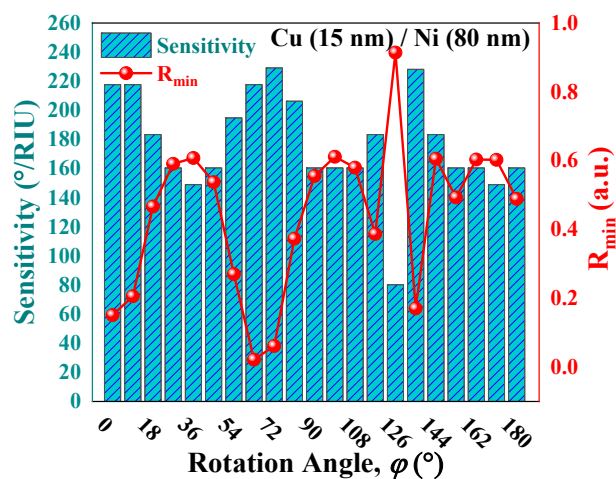

Figure S9. The sensitivity and  $R_{\min}$  with different rotation angle at Cu (15 nm) / Ni (80 nm)

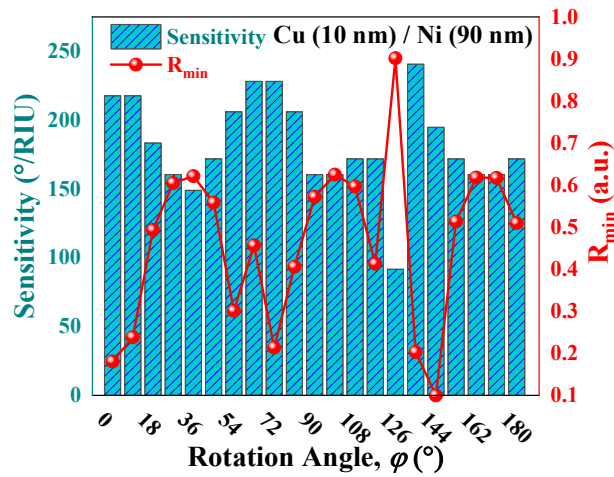

**Figure S10.** The sensitivity and  $R_{\min}$  with different rotation angle at Cu (10 nm) / Ni (90 nm)

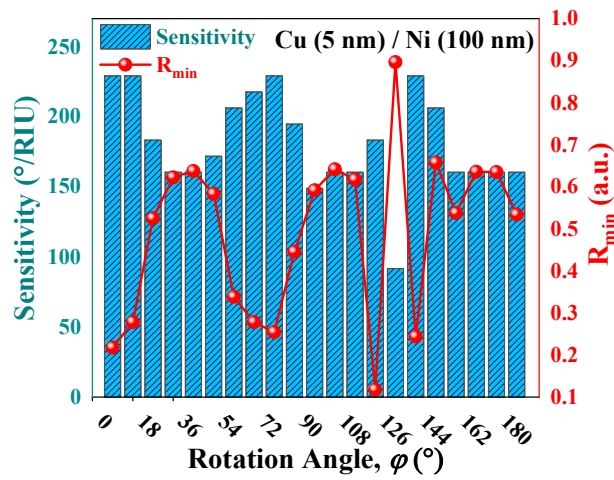

**Figure S11.** The sensitivity and  $R_{\min}$  with different rotation angle at Cu (5 nm) / Ni (100 nm)

## References

1. S. Pal, A. Verma, Y.K. Prajapati, and J.P. Saini, Sensitive detection using heterostructure of black phosphorus, transition metal di-chalcogenides and MXene in SPR sensor, *Appl. Phys. A*. **2020**, 126, 809. <https://doi.org/10.1007/s00339-020-03998-1>.
2. Y. Yuan, X. Yu, Q. Ouyang, Y. Shao, J. Song, J. Qu, and K. T. Yong, Highly anisotropic black phosphorous-graphene hybrid architecture for ultrasensitive plasmonic biosensing: Theoretical insight, *2D Mater.* **2018**, 5, 025015. <https://doi.org/10.1088/2053-1583/aaae21>.
3. M. K. Singh, S. Pal, A. Verma, V. Mishra, Y. K. Prajapati, Ultrasensitive Bi-metallic Surface Plasmon Resonance Biosensor Using Anisotropic Black Phosphorus and Antimonene nanomaterials, *Superlattices and Microstructures*, **2021**, 156, 106969.
